# Supplementary material
Source: Springer Nature journal article supplement (https://www.springermedizin.de/resource/supplementary/12879_2012_2193_MOESM3_ESM.pdf/9443672)
Supplement: MOESM3 [file 9443672]

# Active TB Characteristics

| <b>N°</b> | <b>ORIGIN</b> | <b>SEX</b> | <b>AGE</b> | <b>SPOTS</b> |
|-----------|---------------|------------|------------|--------------|
| 1         | FSU           | F          | 47         | 30-50        |
| 2         | AFRICA        | M          | 18         | 50-100       |
| 3         | AFRICA        | M          | 24         | 50-100       |
| 4         | AFRICA        | M          | 20         | 50-100       |
| 5         | AFRICA        | M          | 20         | 10-20        |
